# Supplementary material
Source: PubMed Central journal article supplement (PMC10448371)
Supplement: jamacardiol-e232424-s001.pdf [file jamacardiol-e232424-s001.pdf]

## Supplementary Online Content

Assadourian JN, Peterson ED, McDonald SA, Gupta A, Navar AM. Health claims and doses of fish oil supplements in the US. *JAMA Cardiol*. Published online August 23, 2023. doi:10.1001/jamacardio.2023.2424

**eTable 1.** Qualified Health Claims for Fish Oil Supplements

**eFigure.** Flow Diagram for Supplement Label Sample

**eTable 2.** String Search Terms to Augment Health Claim Label Statement Categorization

**eTable 3.** Names of Manufacturer and Retailer Fish Oil/Omega-3 Supplements Included in Dosing Analysis

**eTable 4.** EPA, DHA, and EPA+DHA Doses in Fish Oil and Omega-3 Supplements by Manufacturer/Retailer

This supplementary material has been provided by the authors to give readers additional information about their work.

**eTable 1.** Qualified Health Claims for Fish Oil Supplements

This table displays FDA-approved language for qualified health claims (QHCs) for fish oil supplements. All QHCs include mitigating language reflecting lack of scientific consensus.

| Claim Type (Year Approved)    | Example Text                                                                                                                                                                                                                                                                                                                    |
|-------------------------------|---------------------------------------------------------------------------------------------------------------------------------------------------------------------------------------------------------------------------------------------------------------------------------------------------------------------------------|
| Blood Pressure (2019)         | Consuming EPA and DHA combined may help lower blood pressure in the general population and reduce the risk of hypertension. However, FDA has concluded that the evidence is inconsistent and inconclusive. One serving of [name of the food or dietary supplement] provides [ ] gram(s) of EPA and DHA.                         |
|                               | Consuming EPA and DHA combined may reduce the risk of CHD (coronary heart disease) by reducing the risk of hypertension. However, FDA has concluded that the evidence is inconsistent and inconclusive. One serving of [name of the food or dietary supplement] provides [ ] gram(s) of EPA and DHA.                            |
|                               | Research shows that consuming EPA and DHA combined may be beneficial for moderating blood pressure, a risk factor for CHD (coronary heart disease). However, FDA has concluded that the evidence is inconsistent and inconclusive. One serving of [name of the food or dietary supplement] provides [ ] gram(s) of EPA and DHA. |
| Coronary Heart Disease (2004) | Supportive but not conclusive research shows that consumption of EPA and DHA omega-3 fatty acids may reduce the risk of coronary heart disease.                                                                                                                                                                                 |

**eFigure.** Flow Diagram for Supplement Label Sample

This flow chart diagram displays the initial sample of fish oil supplement labels included. The exclusion criteria included multivitamins, prenatal, and pediatric formulations. The final sample was n=2,819 fish oil supplement labels.

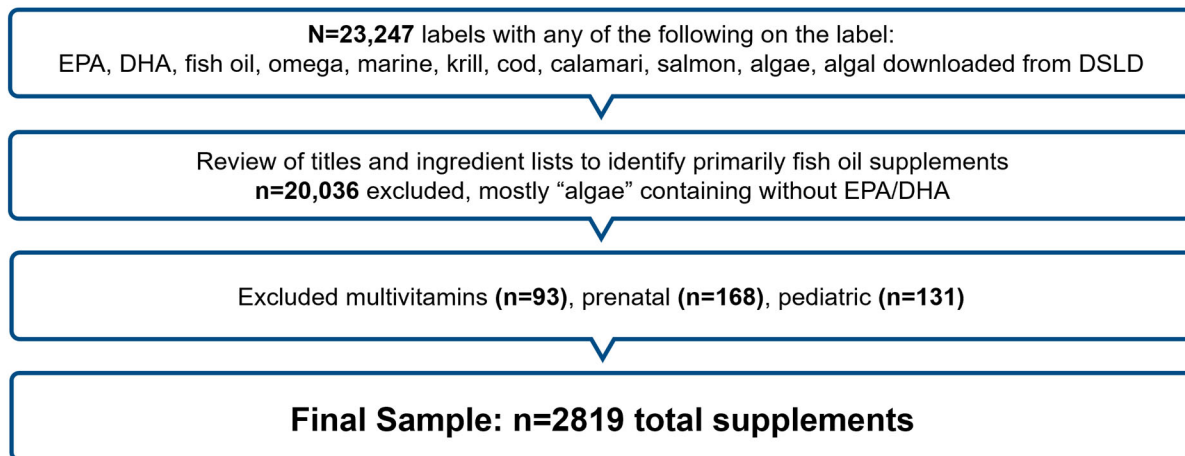

**eTable 2.** String Search Terms to Augment Health Claim Label Statement Categorization

The table shows all text string searches used on label statements to identify the keywords indicating possible health claims by organ system

|                                              |                                                                                                                                                                                                   |
|----------------------------------------------|---------------------------------------------------------------------------------------------------------------------------------------------------------------------------------------------------|
| Heart and Cardiovascular Health              | "heart", "cardio", "blood pressure", "coronary", "artery", "vascular", "cardiovascular", "myocardial", "circulation", "blood", "vessel", "platelets", "elasticity"                                |
| Brain, Neurological, and Mental Health       | "cognition", "cognitive", "mood", "brain", "dementia", "depression", "mind", "spinal", "nervous", "nerve", "neuro", "stress", "concentration", "focus", "emotion", "learning", "relax", "clarity" |
| Joint Health                                 | "arthritis", "joint", "pain", "bone", "density", "mobility"                                                                                                                                       |
| Eye Health                                   | "visual", "eye", "sight", "eyesight", "vision", "ocular", "acuity", "retina"                                                                                                                      |
| Other Musculoskeletal Health                 | "muscle", "strength", "flexibility", "connective"                                                                                                                                                 |
| Lipid/Cholesterol Lowering                   | "lipid", "cholesterol"                                                                                                                                                                            |
| Triglyceride Lowering                        | "triglyceride"                                                                                                                                                                                    |
| Immune Function and Inflammation             | "immune," "infection," "inflammatory", "inflammation", "prostaglandins", "cytokine"                                                                                                               |
| Antioxidant Strength/Cell Membrane Integrity | "cell", "membrane", "radicals", "antioxidant"                                                                                                                                                     |
| QHC language                                 | "supportive", "conclusive", "evidence"                                                                                                                                                            |

**eTable 3.** Names of Manufacturer and Retailer Fish Oil/Omega-3 Supplements Included in Dosing Analysis

This table displays the manufacturers and retail companies investigated with regards to the EPA/DHA doses. In some cases, manufacturer/retail companies have more than one brand name, so these are shown in the right-handed column.

| Manufacturer/Retail Company | Brand Names                          |
|-----------------------------|--------------------------------------|
| Nordic Naturals, Inc.       | Nordic Naturals                      |
| NutriGold Inc.              | NutriGold                            |
| Reckitt Benckiser Group plc | Schiff MegaRed, Schiff               |
| i-Health, Inc.              | Ovega, life's DHA                    |
| Pharmavite LLC              | Nature Made                          |
| NOW Foods                   | NOW, NOW Sports                      |
| Natrol LLC                  | Natrol                               |
| Carlson Laboratories        | Carlson                              |
| The Nature's Bounty Co.     | Nature's Bounty                      |
| Amazon.com                  | Amazon Elements                      |
| Walmart                     | Equate, Member's Mark, Spring Valley |
| The Kroger Co.              | Kroger                               |
| Costco Wholesale            | Kirkland Signature                   |
| Walgreens Boots Alliance    | Well At Walgreens, Finest Nutrition  |
| Target                      | up&up                                |
| CVS Health Corporation      | CVS Pharmacy, CVS Health             |

**eTable 4.** EPA, DHA, and EPA+DHA Doses in Fish Oil and Omega-3 Supplements by Manufacturer/Retailer

| Brand Name | N   | EPA (mg/day)<br>Median (IQR), Range | DHA (mg/day)<br>Median (IQR), Range | EPA+DHA (mg/day)<br>Median (IQR), Range |
|------------|-----|-------------------------------------|-------------------------------------|-----------------------------------------|
| Company A  | 5   | 35.5 (8.5-46.75), 0-50              | 34 (26-234), 24-300                 | 73 (58-187), 50-300                     |
| Company B  | 28  | 210 (50-527.5), 0-1430              | 215 (33-345), 24-570                | 475 (103-877.5), 73-2000                |
| Company C  | 2   | 235 (60-410), 60-410                | 150 (30-270), 30-270                | 385 (90-680), 90-680                    |
| Company D  | 11  | 64 (50-934), 50-1356                | 30 (24-544), 24-888                 | 600 (74-720), 50-2244                   |
| Company E  | 7   | 111 (50-324), 50-324                | 108 (24-216), 24-216                | 250 (74-285), 50-540                    |
| Company F  | 41  | 400 (195-720), 0-2000               | 500 (210-950), 0-2270               | 925 (585-1575), 195-2700                |
| Company G  | 11  | 180 (120-360), 0-646                | 200.1 (90-430), 55-500              | 500 (230-600), 175-1076                 |
| Company H  | 17  | 360 (66.75-524), 0-1000             | 225 (61.75-246), 32-576             | 500 (323.5-630), 50-1440                |
| Company I  | 16  | 155 (40-625), 24-2712               | 133 (27.75-247.8), 20-1776          | 267 (67-881), 60-4488                   |
| Company J  | 53  | 340 (270-762.5), 0-1950             | 425 (287.5-510), 160-1060           | 850 (550-1260), 390-2925                |
| Company K  | 30  | 405 (132.8-720), 0-1200             | 330 (180-525), 40-1200              | 900 (510-1200), 70-1800                 |
| Company L  | 13  | 800 (130-1200), 96-1500             | 400 (79-525), 44-900                | 1200 (209-1750), 140-2300               |
| Company M  | 3   | 0 (0-135), 0-135                    | 270 (200-900), 200-900              | 405 (200-900), 200-900                  |
| Company N  | 16  | 128 (50-360), 45-360                | 60 (27-240), 24-240                 | 314 (115.5-569), 53-630                 |
| Company O  | 1   | 650 (650-650), 650-650              | 450 (450-450), 450-450              | 1100 (1100-1100), 1100-1100             |
| Company P  | 1   | ---                                 | ---                                 | 720 (720-720), 720-720                  |
| Overall    | 255 | 340 (135-647), 0-2712               | 270 (140-500), 0-2270               | 600 (300-1100), 50-4488                 |
