# Supplementary material
Source: PubMed Central journal article supplement (PMC10448371)
Supplement: jamacardiol-e232424-s002.pdf [file jamacardiol-e232424-s002.pdf]

## Data Sharing Statement

Assadourian. Health Claims and Doses of Fish Oil Supplements in the US. *JAMA Cardiol.*  
Published August 23, 2023. doi:10.1001/jamacardio.2023.2424

### Data

**Data available:** Yes

**Data types:** Deidentified participant data

**How to access data:** Data are available at <https://wwwn.cdc.gov/nchs/nhanes/>

**When available:** With publication

### Supporting Documents

**Document types:** None

### Additional Information

**Who can access the data:** Anyone requesting the data

**Types of analyses:** Any type of analysis

**Mechanisms of data availability:** Via download online

**Any additional restrictions:** Per CDC
